# Supplementary material
Source: PubMed Central journal article supplement (PMC2689014)
Supplement: 0810952106_0810952106SI.pdf [file 0810952106_0810952106SI.pdf]

# Supporting Information

Gibby et al. 10.1073/pnas.0810952106

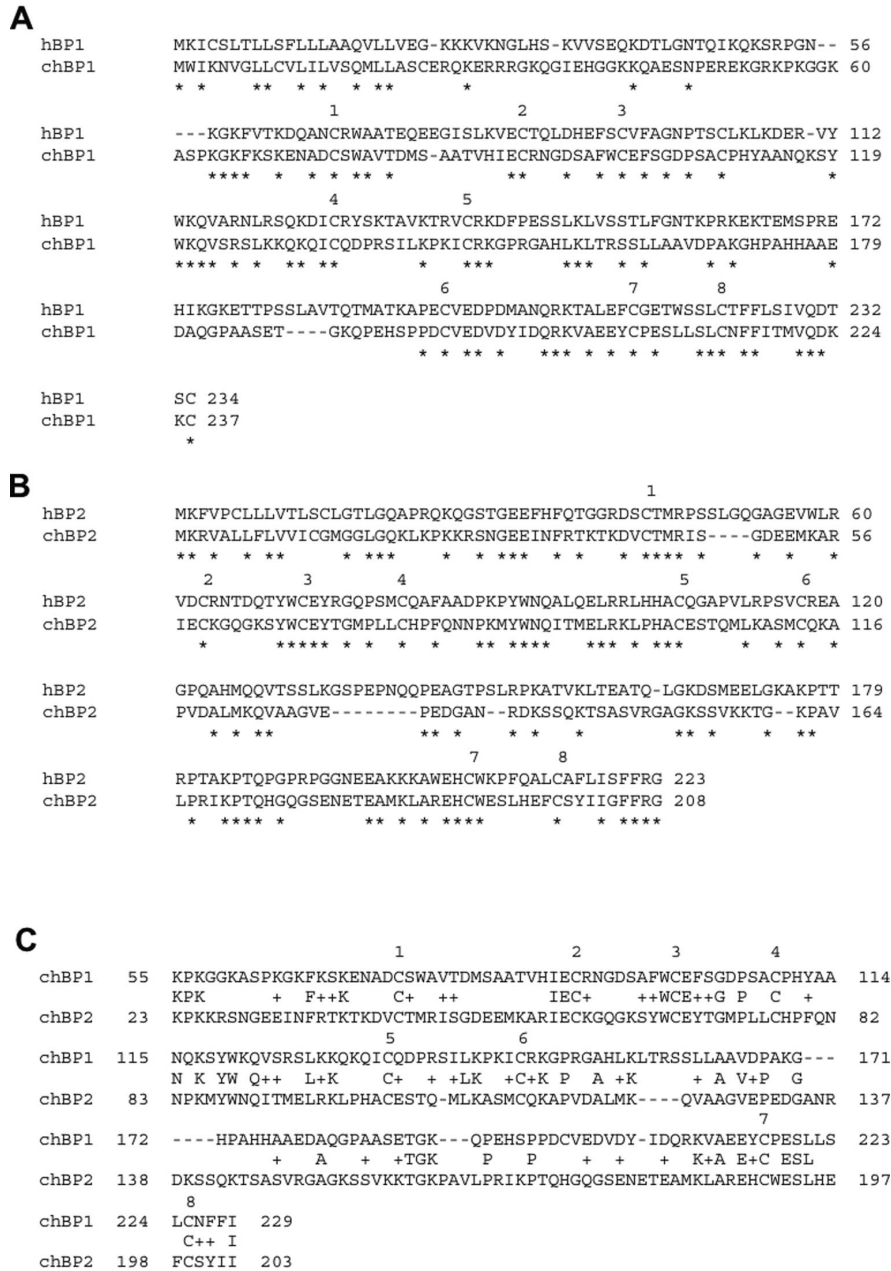

**Fig. S1.** Amino acid sequence alignments of human and chicken BPs. (A, B) Human and *Gallus gallus* BP1 and BP2 alignments. The conserved domain of the FGF-BP protein family is *PFAM06473*. The conserved cysteine spacing pattern in the protein family is C-15/19-C-8-C-8-C-23/24-C-10/11-C-50-90-C-7-C. The respective 8 conserved cysteine positions are numbered from 1 to 8, and identical amino acids are indicated by an asterisk. The C-terminal 42 amino acids in human BP1 contain the FGF-binding domain (10). (C) Alignment of *chBP1* and *chBP2*. Twenty-six percent amino acid identity and 44% conservative replacements (+) were calculated by the BLAST algorithm at the National Center for Biotechnology Information. GenBank entry numbers are hBP1, NP\_005121; hBP2, NP\_114156; chBP1, XP\_420773, and chBP2, NP\_989778.

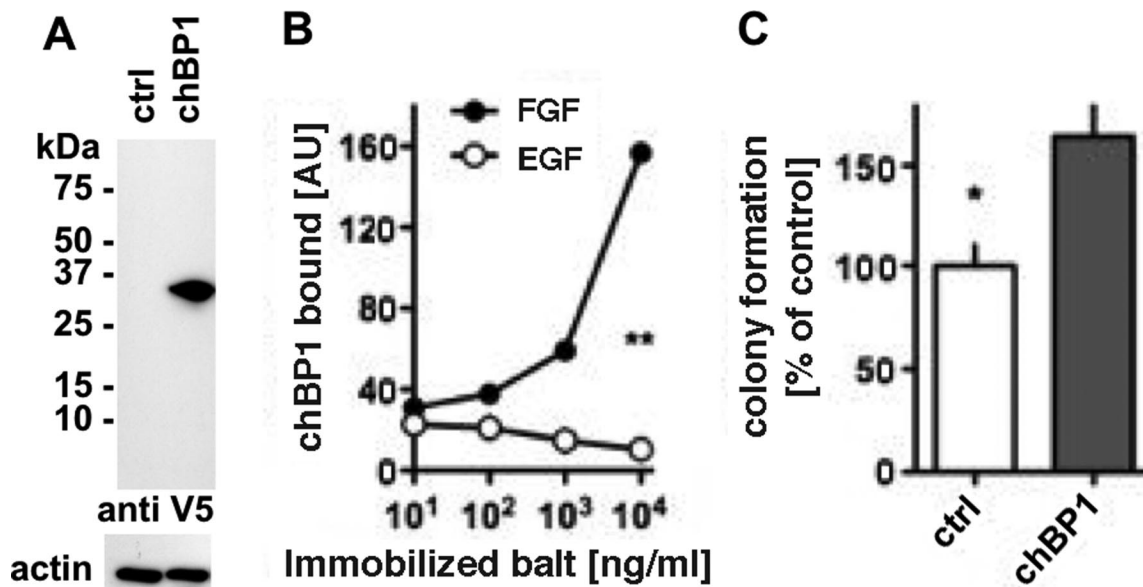

**Fig. S2.** *chBP1* binding to FGF2 and effect on colony formation of SW-13 cells. (A) Western blot for VP5-tagged protein harvested from *chBP1*- versus empty vector (control)-transfected cells. Actin served as a loading control. (B) Binding of *chBP1* to different concentrations of immobilized FGF2 relative to a negative control (epidermal growth factor, EGF). The bound *chBP1* was quantitated by ELISA. \*\*,  $P < 0.01$ . (C) Colony formation of SW-13 cells in soft agar. Control (empty vector)- and *chBP1*-transfected cells were compared. \*,  $P < 0.05$ .

Table S1. Tissue expression of *chBP1* and *chBP2*

| Organ     | Expression Level (number of samples) |              |
|-----------|--------------------------------------|--------------|
|           | <i>chBP1</i>                         | <i>chBP2</i> |
| Brain     | + (3)                                | + (4)        |
| Cartilage | +++ (3)                              | + (4)        |
| Eye       | ++ (3)                               | + (2)        |
| Heart     | 0 (3)                                | 0 (4)        |
| Intestine | +++ (2)                              | +++ (4)      |
| Kidney    | + (2)                                | ++ (4)       |
| Liver     | 0 (3)                                | 0 (5)        |
| Lung      | ++ (2)                               | ++ (2)       |
| Skin      | +++ (4)                              | +++ (5)      |

Expression of *chBP1* and *chBP2* mRNA in different tissues. Expression levels were determined by in situ hybridization as described earlier (37). Tissues harvested at the respective peak expression time were analyzed (see Fig. 2). Scoring was done in a blinded fashion.
